# Supplementary material for: Umbilical Cord Mesenchymal Stromal/Stem Cells and Their Interplay with Th-17 Cell Response Pathway
Source: MDPI journal article supplement (doi:10.3390/cells13020169), 2024-01-16
Supplement: s1 [file s1]

Supplementary Figure S1

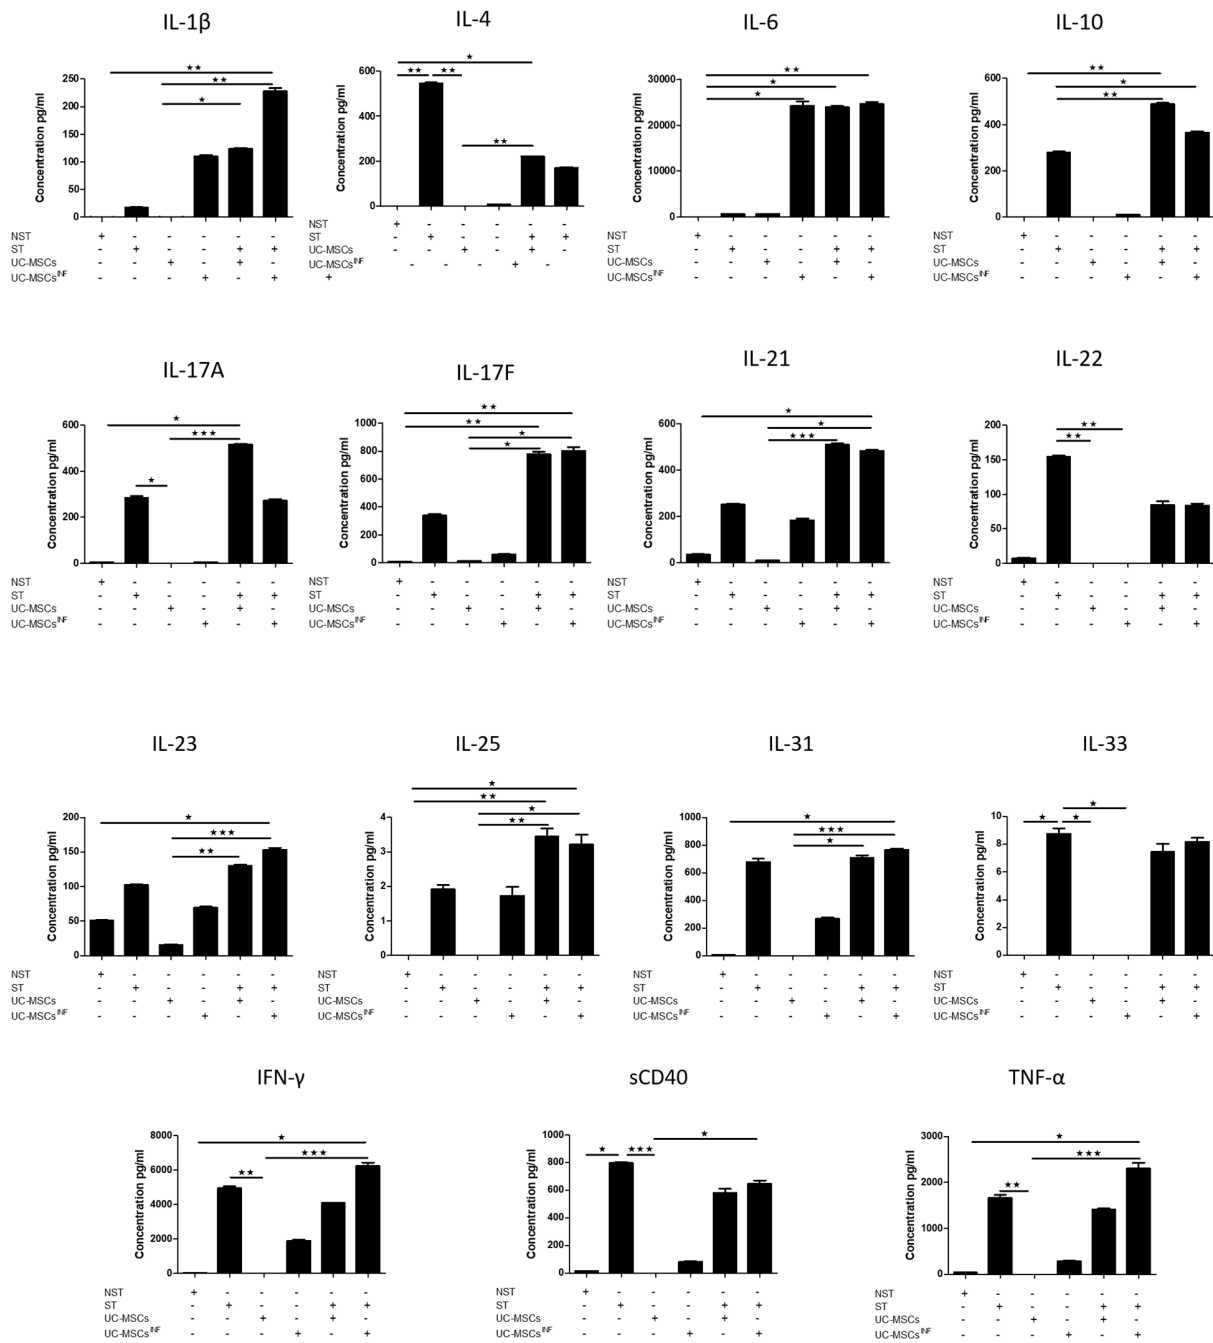

Array profile of cytokines related to Th-17 pathway. In normal and inflammatory setting, UC-MSCs (n=5) were cocultured at a (1:80) cell ratio with either nonstimulated or PHA/IL-2-stimulated T cells, as indicated. The levels of the various cytokines were determined as previously described in the Materials and Methods section. The data for IL-1 $\beta$ , IL-4, IL-6, IL-10, IL-17A, IL-17F, IL-21, IL-22, IL-23, IL-25, IL-31, IL-33, INF- $\gamma$ , sCD40, and TNF- $\alpha$  are shown as concentration  $\pm$  SEM (pg/mL). \* p 0.05, \*\* p 0.01, \*\*\* p 0.01 compared to the matching control. UC-MSCs: umbilical cord mesenchymal stromal / stem cells; UC-MSCs<sup>INF</sup>: preconditioned umbilical cord mesenchymal stromal / stem cells; NST: nonstimulated T cells; ST: PHA/IL-2-stimulated T cells.
